# Supplementary material for: Goodness of fit to a mathematical model for Drosophila sleep behavior is reduced in hyposomnolent mutants
Source: PeerJ. 2016 Jan 4;4:e1533. doi: 10.7717/peerj.1533 (PMC4800425; doi:10.7717/peerj.1533)
Supplement: Supplemental Information 3 — Each row corresponds to an individual animal. [file peerj-04-1533-s003.xlsx]

## Sheet: Sheet1
Data bin size (min)		1
Bin size for plots (min)		30
ZT/CT0		1500
One day equals
Fly health filter		off
Select individual flies?		no
Sleep definition (min)		5
Days included		2
Groups		1
Group		1
Total animals		32
Healthy animals		31
														day 1	day 2	day 1	day 2	day 1	day 2	day 1	day 2	day 1	day 2	day 1	day 2	day 1	day 2	day 1	day 2	day 1	day 2	day 1	day 2	day 1	day 2	day 1	day 2		Fraction of sleep bouts in					Fraction of wake bouts in
Line name	Filename	Tube number	Health value	Cont/exp	Period (periodogram)	Rhythm strength (fft)	Period (autocorrelogram)	Power (autocorrelogram)	Daily active time	Daily sleep time	Daily activity	Peak activity	Activity/waking min	Brief awakenings (ZT/CT0-12)		Brief awakenings (ZT/CT12-24)		Active time (ZT/CT0-12)		Active time (ZT/CT12-24)		Sleep time (ZT/CT0-12)		Sleep time (ZT/CT12-24)		Activity bout length (ZT/CT0-12)		Activity bout length (ZT/CT12-24)		Sleep bout length (ZT/CT0-12)		Sleep bout length (ZT/CT12-24)		Sleep bouts (ZT/CT0-12)		Sleep bouts (ZT/CT12-24)		sleep latency at ZT/CT12 (min)	<= 5 min bouts	5-15 min bouts	15-50 min bouts	50-150 min bouts	> 150 min bouts	.5-5 min bouts	5-15 min bouts	15-50 min bouts	50-150 min bouts	> 150 min bouts	scs
	RunJ222a1CtM034C01.txt	1	5	control					384	1056	1334	154	3.47	3	24	1	3	249	216	160	143	471	504	560	577	18.8	9.3	10.9	8.6	34.3	18.2	48.5	58.4	14	27.3	11.7	10	46.5	0.02	0.48	0.37	0.08	0.06	0.44	0.44	0.06	0.06	0	4.4
	RunJ222a1CtM034C02.txt	2	5	control					315	1125	988	170	3.14	3	1	0	2	150	124	176	179	570	596	544	541	15	12.6	76.8	24.8	56.6	104.8	261.6	89	10	5.6	2	6	41	0.08	0.17	0.42	0.12	0.21	0.6	0.16	0.04	0.16	0.04	12
	RunJ222a1CtM034C03.txt	3	5	control					389	1051	1362	161	3.5	1	1	3	1	273	183	187	135	447	537	533	585	23.6	21.9	16.9	15.2	37.5	52.5	68.8	147.1	12	10.2	7.8	4	69.5	0.03	0.35	0.41	0.12	0.09	0.14	0.51	0.23	0.11	0	8.4
	RunJ222a1CtM034C04.txt	4	5	control					308	1133	1173	181	3.81	3	4	0	2	190	194	121	110	530	526	599	610	13.7	14	16.9	8	33.1	31.9	127.6	76.2	16	16.3	4.7	8	52.5	0.02	0.2	0.49	0.2	0.09	0.31	0.49	0.11	0.09	0	6.2
	RunJ222a1CtM034C05.txt	5	5	control					336	1104	1228	211	3.65	3	6	1	2	154	158	174	186	566	562	546	534	11.8	12.1	29	25.8	44.1	43.6	88	88.8	12.9	13	6.1	6	73.5	0.05	0.34	0.34	0.13	0.13	0.28	0.46	0.13	0.13	0	7.9
	RunJ222a1CtM034C06.txt	6	5	control					416	1024	1052	119	2.53	4	5	1	1	218	180	224	210	502	540	496	510	26.4	22.7	41.7	27.7	56	59.9	124.7	127.2	9	9	4	4	89.5	0.04	0.27	0.23	0.31	0.15	0.37	0.26	0.19	0.15	0.04	9.7
	RunJ222a1CtM034C07.txt	7	5	control					342	1099	1086	145	3.18	2	3	5	2	228	201	113	141	492	519	607	579	17.4	16.9	16.3	12.3	38	36.6	87.2	82.7	13	14.1	7	7	74	0.12	0.24	0.39	0.12	0.12	0.29	0.46	0.15	0.1	0	7.6
	RunJ222a1CtM034C08.txt	8	5	control					329	1111	956	109	2.91	2	13	3	2	154	140	195	168	566	580	525	552	15.8	6.1	16.6	20.2	47	24.8	60.9	66.6	12	23.1	8.6	8.3	67.5	0.04	0.27	0.46	0.15	0.08	0.46	0.31	0.13	0.1	0	4.9
	RunJ222a1CtM034C09.txt	9	5	control					255	1186	645	116	2.53	0	8	0	2	160	144	98	107	560	576	622	613	26.6	9.8	62.9	5.9	92.5	52.2	306.7	121.8	6	11	2	5	38	0	0.08	0.5	0.17	0.25	0.52	0.2	0.12	0.16	0	11.1
	RunJ222a1CtM034C10.txt	10	5	control					348	1092	896	102	2.57	4	8	1	0	206	188	188	114	514	532	532	606	17.8	8.7	17.9	36.5	36.8	38.8	52.9	187.5	14	13.8	10	3.2	66	0.02	0.24	0.49	0.17	0.07	0.29	0.41	0.2	0.1	0	6.8
	RunJ222a1CtM034C11.txt	11	5	control					447	993	1439	149	3.22	2	6	1	0	242	279	176	196	478	441	544	524	24.4	13.3	34.7	20.6	43.6	21.7	109.8	87.4	11	20	5	6	63.5	0.1	0.36	0.24	0.24	0.07	0.23	0.28	0.37	0.12	0	6.8
	RunJ222a1CtM034C12.txt	12	5	control					467	973	1597	158	3.42	7	1	1	3	317	230	216	170	403	490	504	550	23.2	20	52.6	10.7	26.3	37.7	167.8	92.3	15	13	3	6	98.5	0.05	0.32	0.32	0.24	0.05	0.42	0.24	0.24	0.05	0.05	7.2
	RunJ222a1CtM034C13.txt	13	5	control					341	1099	886	111	2.6	7	4	0	4	239	182	118	144	481	538	602	576	15.6	10.9	31.9	8.1	28.2	41.1	150.9	63.3	17	13	4	9	69.5	0.05	0.37	0.33	0.16	0.09	0.48	0.34	0.09	0.09	0	7.8
	RunJ222a1CtM034C14.txt	14	5	control					305	1135	713	117	2.34	1	4	5	3	205	155	126	124	515	565	594	596	19.3	9.4	16.1	7.7	42.9	38	73.7	84.9	12	15	8	7	62	0.07	0.21	0.38	0.29	0.05	0.6	0.19	0.12	0.09	0	7
	RunJ222a1CtM034C15.txt	15	5	control					389	1051	1128	127	2.9	4	4	0	0	189	179	203	207	531	541	517	513	17.7	10.6	29.9	22.1	44.1	33.7	73.5	85.7	12	16	7	6	59.5	0.12	0.27	0.32	0.22	0.07	0.36	0.33	0.21	0.1	0	7.2
	RunJ222a1CtM034C17.txt	17	5	control					301	1139	830	108	2.76	3	3	3	1	186	174	130	112	534	546	590	608	15.5	13.3	11.8	15.1	46.3	38	52.4	121.8	11.8	14.2	11	5	41	0.02	0.19	0.33	0.4	0.05	0.21	0.47	0.3	0.02	0	6.4
	RunJ222a1CtM034C18.txt	18	5	control					388	1052	829	118	2.14	2	8	7	1	243	249	156	128	477	471	564	592	27.2	19.1	15.2	31.7	47	36.9	80.6	147.1	10	12.9	7	4	67	0.06	0.18	0.32	0.32	0.12	0.24	0.26	0.32	0.18	0	7.6
	RunJ222a1CtM034C19.txt	19	5	control					349	1092	997	114	2.86	1	4	5	3	165	195	173	164	555	525	547	556	12.6	21.1	17.4	13.1	42.7	47	54.5	69.3	13	11.1	9.9	8	70.5	0.1	0.26	0.24	0.36	0.05	0.24	0.33	0.38	0.05	0	6.8
	RunJ222a1CtM034C20.txt	20	5	control					345	1095	937	117	2.72	5	8	9	8	220	243	101	126	500	477	619	594	13.3	12.6	11	4.1	26.6	32	47.7	49.1	19	15	13	12	65	0.1	0.29	0.41	0.19	0.02	0.53	0.37	0.03	0.07	0	4.6
	RunJ222a1CtM034C21.txt	21	5	control					421	1019	1214	155	2.88	3	7	1	3	257	210	201	174	463	510	519	546	22.3	12.8	22.8	14.3	37.9	27.4	65	54.9	12	18.1	7.9	10	40	0.1	0.27	0.21	0.42	0	0.23	0.44	0.27	0.06	0	6.1
	RunJ222a1CtM034C22.txt	22	5	control					306	1134	912	139	2.98	4	2	3	2	192	186	121	113	528	534	599	607	17.8	13	18.3	9.8	44.5	44.1	84.9	75.5	12	12	7	8	44.5	0.03	0.21	0.26	0.49	0.03	0.1	0.67	0.13	0.1	0	7.4
	RunJ222a1CtM034C23.txt	23	5	control					466	974	1445	148	3.1	1	1	5	0	326	283	178	144	394	437	542	576	31.5	53.8	16.9	15.9	39	107	68.1	96.5	10	4.1	8	6	52	0	0.18	0.39	0.29	0.14	0.28	0.14	0.45	0.07	0.07	8.7
	RunJ222a1CtM034C24.txt	24	5	control					556	884	1578	162	2.84	2	4	3	5	361	330	188	234	359	390	532	486	41.9	34.7	45.8	29.1	40	43.3	133.4	80.7	9	9	4	6	81	0.04	0.21	0.29	0.39	0.07	0.18	0.07	0.5	0.21	0.04	6.4
	RunJ222a1CtM034C25.txt	25	5	control					501	939	1233	126	2.46	1	4	3	3	299	309	209	185	421	411	511	535	39.7	34.6	41.4	14.6	53.1	50.6	102.8	75.6	8	8	5	7	73.5	0.11	0.11	0.29	0.43	0.07	0.1	0.31	0.45	0.1	0.03	9.3
	RunJ222a1CtM034C26.txt	26	5	control					491	949	1929	195	3.93	0	8	7	7	331	286	179	186	389	434	541	534	21.4	20	11.4	9.9	22.6	26.7	49.1	41.1	17	16.1	10.9	13	65.5	0.07	0.33	0.39	0.21	0	0.28	0.4	0.25	0.07	0	4.4
	RunJ222a1CtM034C27.txt	27	5	control					382	1058	1241	205	3.25	8	5	7	1	259	177	128	200	461	543	592	520	17.8	12.1	8.8	98	28.7	61.8	36.5	509.9	16	8.9	16	1	65.5	0	0.45	0.29	0.21	0.05	0.56	0.19	0.14	0.12	0	6
	RunJ222a1CtM034C28.txt	28	5	control					373	1067	1169	154	3.13	3	4	3	6	225	231	162	128	495	489	558	592	18.7	24.9	27.1	10.8	42.1	47.8	91	74.3	11.8	10.2	6.1	8	59.5	0.03	0.25	0.17	0.53	0.03	0.17	0.47	0.25	0.11	0	7.9
	RunJ222a1CtM034C29.txt	29	5	control					338	1102	982	125	2.91	1	6	9	2	215	158	158	145	505	562	562	575	35.8	13.8	18.6	22.2	86.4	62.7	49.8	115.8	5.8	9	11.3	5	55	0.03	0.16	0.32	0.29	0.19	0.35	0.26	0.26	0.13	0	7.9
	RunJ222a1CtM034C30.txt	30	5	control					541	899	1439	173	2.66	5	9	9	8	223	234	365	259	497	486	355	461	21.6	15.3	45.2	13.3	41.6	34.6	44.9	32.8	12	14	8	14	69	0.08	0.25	0.35	0.31	0	0.27	0.35	0.24	0.14	0	4.8
	RunJ222a1CtM034C31.txt	31	5	control					453	987	1604	163	3.54	3	1	2	1	327	271	153	155	393	449	567	565	35.5	31.7	32.2	26.4	43.8	63.5	112.8	140.9	9	7	5	4	72	0	0.16	0.28	0.4	0.16	0.16	0.2	0.48	0.08	0.08	9.4
	RunJ222a1CtM034C32.txt	32	5	control					211	1229	552	122	2.61	1	3	2	0	177	162	42	42	543	558	678	678	20.9	12.9	1.5	4.9	60.5	42.7	174.2	169.6	9	13.1	3.9	4	30	0.03	0.3	0.13	0.4	0.13	0.33	0.53	0.03	0.1	0	11.5
	RunJ222a1CtM034C16.txt	16	-2	control
