# Supplementary material for: Goodness of fit to a mathematical model for Drosophila sleep behavior is reduced in hyposomnolent mutants
Source: PeerJ. 2016 Jan 4;4:e1533. doi: 10.7717/peerj.1533 (PMC4800425; doi:10.7717/peerj.1533)
Supplement: Supplemental Information 4 — Each row corresponds to an individual animal. [file peerj-04-1533-s004.xlsx]

## Sheet: Sheet1
Data bin size (min)		1
Bin size for plots (min)		30
ZT/CT0		1500
One day equals
Fly health filter		off
Select individual flies?		no
Sleep definition (min)		5
Days included		2
Groups		1
Group		1
Total animals		16
Healthy animals		16
														day 1	day 2	day 1	day 2	day 1	day 2	day 1	day 2	day 1	day 2	day 1	day 2	day 1	day 2	day 1	day 2	day 1	day 2	day 1	day 2	day 1	day 2	day 1	day 2		Fraction of sleep bouts in					Fraction of wake bouts in
Line name	Filename	Tube number	Health value	Cont/exp	Period (periodogram)	Rhythm strength (fft)	Period (autocorrelogram)	Power (autocorrelogram)	Daily active time	Daily sleep time	Daily activity	Peak activity	Activity/waking min	Brief awakenings (ZT/CT0-12)		Brief awakenings (ZT/CT12-24)		Active time (ZT/CT0-12)		Active time (ZT/CT12-24)		Sleep time (ZT/CT0-12)		Sleep time (ZT/CT12-24)		Activity bout length (ZT/CT0-12)		Activity bout length (ZT/CT12-24)		Sleep bout length (ZT/CT0-12)		Sleep bout length (ZT/CT12-24)		Sleep bouts (ZT/CT0-12)		Sleep bouts (ZT/CT12-24)		sleep latency at ZT/CT12 (min)	<= 5 min bouts	5-15 min bouts	15-50 min bouts	50-150 min bouts	> 150 min bouts	.5-5 min bouts	5-15 min bouts	15-50 min bouts	50-150 min bouts	> 150 min bouts	scs
	RunJ226a1CtM013C01.txt	1	5	control					391	1049	1402	170	3.58	1	8	0	2	174	229	167	213	546	491	553	507	24	10.5	24.7	15.5	68.7	23.3	79.9	56.6	8	21	7	9	59.5	0.09	0.29	0.24	0.31	0.07	0.37	0.28	0.22	0.13	0	6
	RunJ226a1CtM013C02.txt	2	5	control					434	1006	1818	184	4.19	3	1	0	1	187	179	262	240	533	541	458	480	18.7	20.8	62.9	35.2	53.9	59.9	113.5	118.5	10	9	4	4	95	0	0.15	0.33	0.33	0.19	0.25	0.18	0.39	0.14	0.04	9.6
	RunJ226a1CtM013C03.txt	3	5	control					386	1055	1421	169	3.69	6	10	1	2	177	208	192	194	543	512	528	526	15.1	8.3	19	15.8	36.6	20.4	79.9	47.1	15	24.9	6.6	11.2	75	0.05	0.34	0.34	0.24	0.02	0.41	0.37	0.15	0.07	0	4.5
	RunJ226a1CtM013C04.txt	4	5	control					337	1104	973	137	2.89	1	5	2	7	226	195	117	135	494	525	603	585	20.5	21.1	23.2	6.5	45.7	46.5	118.5	53.6	10.9	11.1	5.1	11	61.5	0	0.24	0.39	0.29	0.08	0.39	0.39	0.11	0.11	0	6.6
	RunJ226a1CtM013C05.txt	5	5	control					419	1021	1785	189	4.26	1	7	6	3	270	275	114	178	450	445	606	542	22.5	10.5	17.8	12.1	37.9	21.7	61.4	53.9	12	20	10	10	40	0.04	0.31	0.44	0.19	0.02	0.36	0.42	0.15	0.08	0	5.7
	RunJ226a1CtM013C06.txt	6	5	control					302	1138	1031	175	3.42	3	1	1	3	192	150	125	136	528	570	595	584	12.8	15.2	32.8	9.8	36.4	51.3	132.5	96.5	14.5	11	4.5	6	67.5	0.03	0.42	0.28	0.17	0.11	0.35	0.41	0.14	0.11	0	9.2
	RunJ226a1CtM013C07.txt	7	5	control					292	1148	996	148	3.41	7	17	2	3	213	166	93	112	507	554	627	608	11.8	3.7	18	12.3	29.2	22.8	75.4	67	17.7	24	8.3	9	64	0	0.36	0.44	0.14	0.07	0.61	0.31	0.03	0.05	0	5.2
	RunJ226a1CtM013C08.txt	8	5	control					318	1122	1067	159	3.35	6	2	6	0	239	185	144	69	481	535	576	651	17.6	19.9	8.5	6.5	32.3	52.1	47.9	129.7	15	10.1	11.9	5	45.5	0.1	0.26	0.43	0.12	0.1	0.48	0.26	0.17	0.1	0	6.6
	RunJ226a1CtM013C09.txt	9	5	control					337	1103	1056	143	3.13	6	8	1	0	222	216	141	95	498	504	579	625	17.1	16.6	35.2	6.2	43.2	31.2	135.3	310.9	11.5	16.2	4.3	2	82	0.09	0.32	0.32	0.18	0.09	0.49	0.26	0.14	0.11	0	10.1
	RunJ226a1CtM013C10.txt	10	5	control					447	993	1064	105	2.38	5	2	1	2	302	263	163	166	418	457	557	554	27.4	19.5	44.8	12.9	38.1	35.4	131.6	69.3	10.8	13	4.2	8	74.5	0.06	0.19	0.39	0.31	0.06	0.17	0.39	0.33	0.11	0	6.7
	RunJ226a1CtM013C11.txt	11	5	control					403	1038	1407	172	3.49	3	15	2	4	264	278	136	127	456	442	584	593	18.8	10.6	23.9	8.3	32.6	20.7	71.6	58.9	13.8	21	8.2	10	50	0.13	0.28	0.34	0.19	0.06	0.28	0.42	0.25	0.06	0	5.8
	RunJ226a1CtM013C12.txt	12	5	control					317	1123	1155	153	3.64	9	8	1	4	140	167	143	184	580	553	577	536	11.2	8	16.4	19.9	34.1	26.4	115.9	63.7	17	20.6	5	8.4	78	0.1	0.25	0.33	0.25	0.06	0.44	0.33	0.19	0.04	0	6.3
	RunJ226a1CtM013C13.txt	13	5	control					290	1150	1132	165	3.9	6	6	4	1	190	130	136	124	530	590	584	596	16.9	8.6	7.7	24	37.8	39.5	65.4	118.8	14	14.9	9	5	70.5	0.02	0.09	0.56	0.26	0.07	0.53	0.28	0.12	0.07	0	6.2
	RunJ226a1CtM013C14.txt	14	5	control					446	995	1872	176	4.2	1	4	0	2	203	161	281	246	517	559	439	474	26.9	17.6	37.3	15.4	57.2	50.4	73.2	47.5	9	11	6	10	83.5	0.03	0.19	0.36	0.33	0.08	0.24	0.3	0.35	0.08	0.03	7
	RunJ226a1CtM013C15.txt	15	5	control					434	1006	1579	194	3.64	3	1	0	2	297	274	127	170	423	446	593	550	19.8	17.1	61.5	13.7	27.6	37.5	196	49.5	15	12	3	11	27	0.1	0.39	0.24	0.22	0.05	0.32	0.34	0.24	0.1	0	7.4
	RunJ226a1CtM013C16.txt	16	5	control					368	1072	1385	210	3.76	4	2	1	1	213	185	174	165	507	535	546	555	26.4	15.6	31.8	8.1	56	59.4	91.5	42.7	9	9	6	13	58	0.05	0.35	0.32	0.11	0.16	0.39	0.24	0.26	0.11	0	8.3
