# Supplementary material for: Goodness of fit to a mathematical model for Drosophila sleep behavior is reduced in hyposomnolent mutants
Source: PeerJ. 2016 Jan 4;4:e1533. doi: 10.7717/peerj.1533 (PMC4800425; doi:10.7717/peerj.1533)
Supplement: Supplemental Information 6 — Control behavior is shown in rows 18–49. Insomniac behavior is shown in rows 56–88. The rest of this chart should be self-explanatory, as all columns are labelled. ZT/CT0-12 refers to daytime; ZT/CT12-24 refers to nighttime. [file peerj-04-1533-s006.xlsx]

## Sheet: May21incM002_iData
Data bin size (min)		1
Bin size for plots (min)		30
ZT/CT0		900
One day equals
Fly health filter		off
Select individual flies?		no
Sleep definition (min)		5
Days included		4
Groups		2
Group		1
Total animals		32
Healthy animals		31
														day 1	day 2	day 3	day 4	day 1	day 2	day 3	day 4	day 1	day 2	day 3	day 4	day 1	day 2	day 3	day 4	day 1	day 2	day 3	day 4	day 1	day 2	day 3	day 4	day 1	day 2	day 3	day 4	day 1	day 2	day 3	day 4	day 1	day 2	day 3	day 4
Line name	Filename	Tube number	Health value	Cont/exp	Period (periodogram)	Rhythm strength (fft)	Period (autocorrelogram)	Power (autocorrelogram)	Daily active time	Daily sleep time	Daily activity	Peak activity	Activity/waking min	Brief awakenings (ZT/CT0-12)				Brief awakenings (ZT/CT12-24)				Active time (ZT/CT0-12)				Active time (ZT/CT12-24)				Sleep time (ZT/CT0-12)				Sleep time (ZT/CT12-24)				Activity bout length (ZT/CT0-12)				Activity bout length (ZT/CT12-24)				Sleep bout length (ZT/CT0-12)
	May21M002C01.txt	1	5	control	24	0.113	24	0.35	309	1131	581	110	1.88	2	6	5	5	0	1	0	0	263	282	254	264	66	51	25	30	457	438	466	456	654	669	695	690	24.2	27.2	19.5	20.6	31.8	22.4	5.9	24.8	45.5	43	39.1	37.5
	May21M002C02.txt	2	5	control	23.5	0.094	24	0.62	397	1044	1024	150	2.58	5	3	8	4	1	2	0	4	289	353	391	316	54	77	48	58	431	367	329	404	666	643	672	662	40.1	45.2	24.7	29.3	22.3	11.5	54.9	5.8	72.4	60.7	23.6	57.1
	May21M002C03.txt	3	5	control	23.5	0.098	24	0.7	450	990	1032	128	2.29	7	5	5	5	0	1	1	3	421	337	364	464	59	78	39	38	299	383	356	256	661	642	681	682	41.6	37.9	33.2	44.5	11.9	4.7	1.5	2.4	37.5	46.8	35.5	27.7
	May21M002C04.txt	4	5	control	23.5	0.197	24	0.44	475	965	776	135	1.63	3	13	4	18	2	0	5	1	449	395	469	475	47	11	45	10	271	325	251	245	673	709	675	710	28.8	20.2	21.6	30.3	10.9	1.4	7	1	18.3	17.1	12	17.1
	May21M002C05.txt	5	5	control	23.5	0.284	24	0.5	294	1146	592	124	2.01	17	15	18	12	4	4	6	2	269	304	259	260	18	13	43	11	451	416	461	460	702	707	677	709	15.1	19.3	12.1	20.4	5	2.3	2.2	1	25	27.6	21.7	36.8
	May21M002C07.txt	7	5	control	23.5	0.077	24	0.27	431	1009	655	84	1.52	7	7	4	1	3	0	4	0	377	337	371	356	74	48	84	75	343	383	349	364	646	672	636	645	20.6	21.1	43.2	17.1	9.1	23.3	20.5	14.3	18.3	23.4	43.1	22.5
	May21M002C08.txt	8	5	control	24	0.123	24	0.53	404	1036	809	130	2	12	8	12	5	0	2	1	1	409	350	384	377	20	20	23	33	311	370	336	343	700	700	697	687	26.5	33.5	22.4	39.4	3.1	1.1	1.1	9.5	21.4	41.1	20.6	42.4
	May21M002C09.txt	9	5	control	23.5	0.044	24	0.57	458	982	870	117	1.9	1	7	0	3	4	2	6	3	349	374	387	371	84	93	80	94	371	346	333	349	636	627	640	626	52.2	28.2	45.7	32.5	6.9	26.3	17.5	22.3	60.7	28.7	65.9	49.9
	May21M002C10.txt	10	5	control	24	0.044	24	0.46	324	1116	868	169	2.68	8	10	8	2	12	0	9	5	302	292	255	245	74	25	55	47	418	428	465	475	646	695	665	673	23.7	15.4	25.4	44.2	6.7	4.3	2.8	2.7	35	28.3	49.9	94.8
	May21M002C11.txt	11	5	control	23.5	0.132	24	0.63	350	1091	942	144	2.7	6	1	2	8	0	1	9	5	323	379	257	334	18	15	43	29	397	341	463	386	702	705	677	691	26.2	46.9	30.6	28.9	3.7	8	1.6	1.7	32.9	48.2	64.9	35
	May21M002C12.txt	12	5	control	24	0.146	24	0.56	505	936	1079	130	2.14	12	6	0	7	4	0	0	4	491	478	440	446	59	30	29	45	229	242	280	274	661	690	691	675	25.8	29.7	32	33.1	24.2	49	5	3.3	12.8	19.2	27	24.5
	May21M002C13.txt	13	5	control	24	0.068	24	0.46	430	1010	781	117	1.82	2	23	9	14	8	10	0	1	357	364	310	374	84	103	55	74	363	356	410	346	636	617	665	646	28.2	17.7	17.8	19.6	5.7	3	3.2	24	29.6	16.4	21.9	17.9
	May21M002C14.txt	14	5	control	23.5	0.074	24	0.55	289	1151	556	82	1.92	9	1	2	5	0	0	0	0	256	257	248	259	54	21	25	37	464	463	472	461	666	699	695	683	15	26.3	21.7	26.6	31.8	9	9.7	8.6	27.3	50.5	42.2	51.1
	May21M002C15.txt	15	5	control	23.5	0.145	24	0.61	412	1028	943	153	2.29	10	7	3	1	0	1	1	0	420	381	398	342	16	46	18	27	300	339	322	378	704	674	702	693	28.9	26.4	41.6	29.3	3	13.7	1.6	13.5	20.7	27.8	40	38.5
	May21M002C16.txt	16	5	control	24	0.052	24	0.37	291	1149	503	106	1.73	7	2	8	6	0	1	0	0	276	222	225	237	62	41	50	51	444	498	495	483	658	679	670	669	21.1	19.9	17.7	17.4	19.1	10.2	23.2	12.7	35	45	38	36.9
	May21M002C17.txt	17	5	control	23.5	0.129	24	0.45	364	1077	664	83	1.83	5	2	1	4	1	0	2	0	289	359	340	279	43	54	47	43	431	361	380	441	677	666	673	677	18.1	27.1	27.9	18.6	6.3	34.5	9.2	10.7	26.9	27.7	42.2	28.9
	May21M002C18.txt	18	5	control	24	0.134	24	0.53	333	1107	693	114	2.08	3	4	4	2	0	0	2	9	321	294	369	286	10	7	17	30	399	426	351	434	710	713	703	690	32.9	27.3	34.3	49	1.3	0.6	1.6	1.8	45	43.5	38.8	85.8
	May21M002C19.txt	19	5	control	(( 23.5 ))	0.179	23	0	212	1228	514	143	2.43	8	3	21	11	14	3	5	3	245	160	187	118	65	8	38	27	475	560	533	602	655	712	682	693	12.5	9.6	8.3	6.2	2.8	1	4.2	3.8	23.7	35	23	29
	May21M002C20.txt	20	5	control	23.5	0.153	24	0.62	421	1019	857	149	2.04	9	8	6	8	0	1	0	0	392	393	370	383	30	60	25	30	328	327	350	337	690	660	695	690	26.9	29.7	27.9	19.3	9.5	15.7	4.1	4	25	27.5	28.3	17
	May21M002C21.txt	21	5	control	23.5	0.085	24	0.57	370	1070	616	111	1.66	1	11	9	3	1	1	0	0	323	287	291	289	109	41	64	78	397	433	429	431	611	679	656	642	21.1	18.3	21.6	20.3	35.4	9.5	14.6	20.5	25.6	30.3	30.7	30.7
	May21M002C22.txt	22	5	control	23.5	0.247	24	0.71	324	1116	792	124	2.45	4	6	5	3	4	1	3	1	351	322	279	280	22	15	13	13	369	398	441	440	698	705	707	707	27.5	20.6	21.9	25.7	2.2	2.6	1.2	3.5	30.8	27.5	40.4	43.3
	May21M002C23.txt	23	5	control	24	0.036	24	0.5	410	1030	817	123	1.99	5	10	13	9	1	7	1	5	279	329	273	304	97	128	90	140	441	391	447	416	623	592	630	580	25.6	14.5	12.8	17.5	41	14.1	8.8	13.1	36.6	22.9	23.4	24.4
	May21M002C24.txt	24	5	control	23.5	0.082	24	0.46	315	1125	550	102	1.75	14	22	11	17	1	0	0	0	287	292	280	282	33	37	28	20	433	428	440	438	687	683	692	700	11.5	11.8	20.3	11.5	6	18.6	31.6	3.1	17.2	17	36.2	18.5
	May21M002C25.txt	25	5	control	24	0.108	24	0.59	332	1108	819	142	2.46	8	4	2	3	1	1	0	1	310	296	288	278	42	56	30	29	410	424	432	442	678	664	690	691	22.5	27	28.4	30	3.7	11	5.1	1.6	28.6	42	42.5	47.7
	May21M002C26.txt	26	5	control	23.5	0.228	24	0.52	345	1095	761	131	2.21	3	5	2	8	0	0	0	0	343	307	327	339	26	15	13	10	377	413	393	381	694	705	707	710	24	25.4	30.7	26.7	13	2.5	1	1.4	28.4	41.5	43.8	34
	May21M002C27.txt	27	5	control	(( 24 ))	0.011	24	0.4	454	986	902	130	1.99	1	7	2	8	1	0	0	0	413	332	314	365	168	102	67	53	307	388	406	355	552	618	653	667	45.5	20.5	49.2	20.6	54.8	34	18.4	20.8	38.7	25.6	67.4	19.7
	May21M002C28.txt	28	5	control	24	0.08	24	0.43	212	1228	567	140	2.68	18	4	4	9	9	11	2	8	130	111	133	149	91	76	72	84	590	609	587	571	629	644	648	636	7	13.7	10.3	8.9	4	2.7	6	5.8	25.2	67.1	39	31.4
	May21M002C29.txt	29	5	control	23.5	0.125	24	0.5	539	901	926	125	1.72	5	4	4	7	0	8	7	2	484	502	478	482	17	106	57	30	236	218	242	238	703	614	663	690	50.3	51.4	62.2	33.2	2.8	7.9	6.8	2.4	38.3	27.5	39.9	19.2
	May21M002C30.txt	30	5	control	24	0.058	24	0.34	231	1209	422	107	1.82	5	5	15	9	1	2	0	1	162	150	231	181	88	48	33	32	558	570	489	539	632	672	687	688	11.7	10.7	12.9	10.9	19.2	4.1	2.2	3.3	35	35	25.2	30.8
	May21M002C31.txt	31	5	control	23.5	0.167	24	0.69	411	1029	923	131	2.24	6	2	5	3	0	4	2	1	406	376	394	353	32	32	25	26	314	344	326	367	688	688	695	694	35	38.9	33.8	30.5	15.5	4.2	2	3.3	31.5	42.4	32.5	35.5
	May21M002C32.txt	32	5	control	23.5	0.169	24	0.53	412	1028	776	104	1.88	3	5	2	3	0	6	0	13	361	391	321	397	25	37	30	85	359	329	399	323	695	683	690	635	32	31.4	37.7	54.6	4.6	2.5	43.1	2.9	36.5	27.5	56.3	63.9
	May21M002C06.txt	6	-2	control
Group		2
Total animals		32
Healthy animals		31
														day 1	day 2	day 3	day 4	day 1	day 2	day 3	day 4	day 1	day 2	day 3	day 4	day 1	day 2	day 3	day 4	day 1	day 2	day 3	day 4	day 1	day 2	day 3	day 4	day 1	day 2	day 3	day 4	day 1	day 2	day 3	day 4	day 1	day 2	day 3	day 4
Line name	Filename	Tube number	Health value	Cont/exp	Period (periodogram)	Rhythm strength (fft)	Period (autocorrelogram)	Power (autocorrelogram)	Daily active time	Daily sleep time	Daily activity	Peak activity	Activity/waking min	Brief awakenings (ZT/CT0-12)				Brief awakenings (ZT/CT12-24)				Active time (ZT/CT0-12)				Active time (ZT/CT12-24)				Sleep time (ZT/CT0-12)				Sleep time (ZT/CT12-24)				Activity bout length (ZT/CT0-12)				Activity bout length (ZT/CT12-24)				Sleep bout length (ZT/CT0-12)
	May21M003C01.txt	1	5	experimental	(( 24 ))	0.001	21.8	0.17	307	1133	543	149	1.77	13	21	25	26	14	19	14	10	289	198	173	106	183	152	63	64	431	522	547	614	537	568	657	656	13	6.4	7.4	4.5	7.3	6.5	3.3	4.5	18.5	18.9	22.7	25
	May21M003C02.txt	2	5	experimental	(( 25 ))	0.162	21.8	0.29	854	586	1931	204	2.26	16	15	14	25	7	9	5	18	303	363	265	202	566	618	573	525	417	357	455	518	154	102	147	195	13.4	14.6	15.9	10.7	34.4	43	33.4	19.2	19.1	13.5	22.2	20.2
	May21M003C03.txt	3	5	experimental	(( 23.5 ))	0.051	23.8	0.42	497	943	1188	197	2.39	15	10	6	3	15	6	3	3	234	229	206	201	281	330	257	248	486	491	514	519	439	390	463	472	9.7	10.8	9.4	9.6	8.4	13.2	11.3	12.2	17.8	24.4	22.2	24.5
	May21M003C04.txt	4	5	experimental	23.5	0.04	24	0.19	500	940	1186	156	2.37	7	6	16	12	6	1	4	2	215	292	281	267	228	240	280	195	505	428	439	453	492	480	440	525	18.7	27.5	17.3	18	16.8	21.7	23	17.9	38.8	43	24.3	30.3
	May21M003C05.txt	5	5	experimental	(( 23.5 ))	0.063	23.5	0.26	498	942	1054	136	2.12	11	21	10	6	7	5	7	4	330	362	308	291	229	181	134	157	390	358	412	429	491	539	586	563	19.1	19.8	20.9	20.4	18.2	23.9	14.3	15.9	23.2	21.2	27.3	30.3
	May21M003C06.txt	6	5	experimental	24	0.078	24	0.16	889	551	1287	131	1.45	23	45	19	40	20	15	17	23	345	389	486	448	477	428	519	465	375	331	234	272	243	292	201	255	11.5	12	20	14.7	24.7	15.2	20.1	14.3	12.1	9.3	9.2	8.5
	May21M003C07.txt	7	5	experimental	(( 27.5 ))	0.004	23	0.08	661	780	804	105	1.22	8	26	54	49	15	39	30	43	569	418	214	180	455	296	307	203	151	302	506	540	265	424	413	517	28.9	12.6	5.2	4.6	16.3	7.4	9.2	5.3	7.4	9.2	11.6	14.3
	May21M003C08.txt	8	5	experimental	23.5	0.148	24	0.26	497	943	802	132	1.61	44	38	39	31	8	17	12	25	200	182	166	162	379	333	293	274	520	538	554	558	341	387	427	446	5.1	6.7	5.6	6.6	42	16.4	14.4	9.5	11.9	16.4	16.3	19.1
	May21M003C09.txt	9	5	experimental	(( ))	0.014	22.5	0	824	616	1817	179	2.2	43	37	25	40	8	14	20	8	357	335	442	346	520	458	364	474	363	385	278	374	200	262	356	246	10.3	9.5	17.4	9.8	19.5	19.9	9.6	16.7	8.7	9.5	10.8	9.4
	May21M003C11.txt	11	5	experimental	23.5	0.029	23.8	0.35	507	933	882	159	1.74	8	15	11	10	2	5	6	8	204	260	276	307	309	250	196	227	516	460	444	413	411	470	524	493	19.6	12.8	16.4	17.6	13.9	17.2	14.8	7.3	42.9	20.7	25.9	22.8
	May21M003C12.txt	12	5	experimental	(( 23.5 ))	0	24	0.12	571	869	1360	181	2.38	8	4	6	4	4	3	16	2	347	373	347	322	230	258	248	160	373	347	373	398	490	462	472	560	17.8	22.5	20.5	17.5	15.9	19.7	13.8	13.7	19.5	21.5	24.7	24.4
	May21M003C13.txt	13	5	experimental	24	0.038	24	0.14	420	1020	802	98	1.91	12	6	10	12	3	1	3	1	309	220	255	243	203	154	149	147	411	500	465	477	517	566	571	573	10.8	8.5	11	10.4	9.4	10.5	9.7	8.6	13.3	18.7	18.4	20
	May21M003C14.txt	14	5	experimental	23.5	0.207	24	0.19	782	658	1461	102	1.87	7	4	4	6	3	2	2	2	381	355	289	270	500	482	407	445	339	365	431	450	220	238	313	275	11.5	10.8	10.2	7.9	20.1	14.7	11.4	14.1	10.1	10.8	12.6	12.6
	May21M003C15.txt	15	5	experimental	(( 23.5 ))	0.096	24	0.22	887	553	1432	105	1.62	31	46	42	14	6	6	13	25	496	456	420	318	517	482	438	420	224	264	300	402	203	238	282	300	26.1	14.4	11.1	16.5	54.1	28.1	15.9	12.2	12.3	8.1	8.8	18.2
	May21M003C16.txt	16	5	experimental	24	0.064	24	0.13	761	679	1623	163	2.13	5	5	7	6	5	3	8	2	522	480	544	471	307	221	232	268	198	240	176	249	413	499	488	452	40.9	31	31.7	32.9	18.2	18.7	18.8	24.1	20	18.1	12	18.8
	May21M003C17.txt	17	5	experimental	23.5	0.042	24	0.23	1200	240	2165	152	1.8	2	5	3	13	4	4	4	4	635	636	671	590	553	597	583	534	85	84	49	130	167	123	137	186	41.8	45	61.6	32.3	49.9	70	58.1	33.7	6.1	7.1	6.2	7.8
	May21M003C18.txt	18	5	experimental	23.5	0.034	24	0.21	645	795	745	94	1.15	55	56	66	42	15	28	25	9	392	359	371	357	261	319	246	276	328	361	349	363	459	401	474	444	12.3	8.3	10.3	13	10.8	11.8	7.4	17.3	9.1	8.7	9.2	12.6
	May21M003C19.txt	19	5	experimental	24	0.036	24	0.16	441	999	557	77	1.26	13	15	12	10	5	9	5	1	271	246	195	222	238	221	231	141	449	474	525	498	482	499	489	579	14.2	9.8	9.7	12.9	16.1	13	14.6	13.1	20.9	22.6	26.2	26.7
	May21M003C20.txt	20	5	experimental	23.5	0.046	24	0.33	649	791	997	103	1.53	12	13	14	6	2	0	6	6	254	212	172	659	271	270	273	487	466	508	548	61	449	450	447	233	15.1	12.4	12.4	46.4	48.1	23.9	14.7	50.3	29.4	25.5	27.2	5
	May21M003C21.txt	21	5	experimental	(( 23.5 ))	0.066	21	0.18	1083	358	2010	239	1.86	13	11	24	24	10	3	8	5	479	557	492	506	537	580	643	536	241	163	228	214	183	140	77	184	21.4	27.1	12.6	17.9	30.6	71.5	47.9	33.8	10.9	8.9	6.7	7.8
	May21M003C22.txt	22	5	experimental	(( 23.5 ))	0.172	24	0.38	642	798	783	70	1.22	10	9	8	6	9	4	11	5	568	518	466	423	145	177	132	139	152	202	254	297	575	543	588	581	32.2	28.4	16.7	25.3	13.1	14.2	10.1	8.5	8.5	11.2	9.3	18.1
	May21M003C23.txt	23	5	experimental	(( 30.5 ))	0.001	24	0.13	704	736	1700	174	2.42	5	4	8	7	7	3	3	0	408	349	321	372	346	327	381	311	312	371	399	348	374	393	339	409	17.4	22.1	14.5	15.3	17.3	19.6	24.6	18.8	12.6	24.5	17.9	14
	May21M003C24.txt	24	5	experimental	24	0.074	24	0.09	873	567	1098	117	1.26	42	35	31	31	22	9	26	12	443	445	411	365	471	502	448	409	277	275	309	355	249	218	272	311	13.8	14.2	12	11	18	29.4	18.6	19.9	8	8.6	9.1	10.9
	May21M003C25.txt	25	5	experimental	23.5	0.085	24	0.11	506	934	1051	198	2.08	14	7	15	13	2	12	12	10	364	268	275	375	245	168	196	132	356	452	445	345	475	552	524	588	25.1	14.1	13	19.8	11.5	8.1	12.2	6.3	23.3	23	19.4	18.1
	May21M003C26.txt	26	5	experimental	24	0.302	23	0.28	507	934	811	117	1.6	50	26	22	10	36	8	10	1	394	168	110	15	466	381	409	83	326	552	610	705	254	339	311	637	14.5	8.3	7.8	1.2	13.4	15.4	18.4	9.9	11	20	25.2	53
	May21M003C27.txt	27	5	experimental	(( 23.5 ))	0.013	24	0.05	722	718	1411	159	1.95	16	15	8	12	8	8	10	4	543	393	461	330	365	331	237	229	177	327	259	390	355	389	483	491	27.2	11.9	27.2	13.1	21	25.6	8.5	16.8	8.1	11	18.2	14.6
	May21M003C28.txt	28	5	experimental	23.5	0.464	24	0.13	743	697	1113	99	1.5	9	6	3	10	8	10	4	5	221	229	174	189	595	556	539	469	499	491	546	531	125	164	181	251	8.4	12.6	10.7	9.9	27.8	18.6	22.5	16.1	15.2	22.5	24.3	23
	May21M003C29.txt	29	5	experimental	(( 23.5 ))	0.071	23.5	0.31	334	1106	722	185	2.16	15	13	24	10	0	4	6	3	269	182	288	197	125	74	106	96	451	538	432	523	595	646	614	624	12.1	11.4	10.4	8.8	19.6	9.2	10.1	9.9	19.3	31.1	15	23.6
	May21M003C30.txt	30	5	experimental	(( 24 ))	0.015	24	0.05	796	644	2139	230	2.69	2	13	6	8	2	1	5	2	478	464	444	476	342	335	308	338	242	256	276	244	378	385	412	382	37.5	22.8	44	28.2	40.6	61.9	26.5	38.7	20	16.3	27	15.3
	May21M003C31.txt	31	5	experimental	29	0.18	23	0.29	570	870	807	208	1.42	40	27	23	10	12	19	10	10	349	138	238	68	558	234	590	104	371	582	482	652	162	486	130	616	14.9	5.3	14.9	2.9	27.2	10.9	37.6	3.8	12.4	21.6	24	25.9
	May21M003C32.txt	32	5	experimental	24	0.032	24	0.31	899	541	1321	119	1.47	10	16	12	10	4	1	4	4	658	599	610	584	323	315	267	239	62	121	110	136	397	405	453	481	47.8	29	39.8	36.3	29.4	38.8	20.6	16.6	5.5	6.1	9.6	8.3
	May21M003C10.txt	10	-2	experimental
[truncated: 24 more columns]
