# Supplementary material for: Goodness of fit to a mathematical model for Drosophila sleep behavior is reduced in hyposomnolent mutants
Source: PeerJ. 2016 Jan 4;4:e1533. doi: 10.7717/peerj.1533 (PMC4800425; doi:10.7717/peerj.1533)
Supplement: Supplemental Information 8 — Each row corresponds to an individual animal. [file peerj-04-1533-s008.xlsx]

## Sheet: Sheet1
Data bin size (min)		1
Bin size for plots (min)		30
ZT/CT0		1500
One day equals
Fly health filter		off
Select individual flies?		no
Sleep definition (min)		5
Days included		2
Groups		1
Group		1
Total animals		16
Healthy animals		16
														day 1	day 2	day 1	day 2	day 1	day 2	day 1	day 2	day 1	day 2	day 1	day 2	day 1	day 2	day 1	day 2	day 1	day 2	day 1	day 2	day 1	day 2	day 1	day 2		Fraction of sleep bouts in					Fraction of wake bouts in
Line name	Filename	Tube number	Health value	Cont/exp	Period (periodogram)	Rhythm strength (fft)	Period (autocorrelogram)	Power (autocorrelogram)	Daily active time	Daily sleep time	Daily activity	Peak activity	Activity/waking min	Brief awakenings (ZT/CT0-12)		Brief awakenings (ZT/CT12-24)		Active time (ZT/CT0-12)		Active time (ZT/CT12-24)		Sleep time (ZT/CT0-12)		Sleep time (ZT/CT12-24)		Activity bout length (ZT/CT0-12)		Activity bout length (ZT/CT12-24)		Sleep bout length (ZT/CT0-12)		Sleep bout length (ZT/CT12-24)		Sleep bouts (ZT/CT0-12)		Sleep bouts (ZT/CT12-24)		sleep latency at ZT/CT12 (min)	<= 5 min bouts	5-15 min bouts	15-50 min bouts	50-150 min bouts	> 150 min bouts	.5-5 min bouts	5-15 min bouts	15-50 min bouts	50-150 min bouts	> 150 min bouts	scs
	RunJ226a1CtM016C01.txt	1	5	control					1260	181	3421	222	2.72	0	1	1	6	675	640	647	557	45	80	73	163	75.3	63.2	71.7	24.3	6.7	10	12.5	7.5	6	8	6	20	112	0.3	0.57	0.12	0	0	0.12	0.15	0.44	0.22	0.07	0.4
	RunJ226a1CtM016C02.txt	2	5	control					1051	389	5060	234	4.82	3	7	0	3	485	493	490	633	235	227	230	87	31.8	20	112.6	55.7	16	10	227.7	14.1	15	22	1	6	91.5	0.16	0.57	0.25	0	0.02	0.29	0.33	0.27	0.02	0.09	2.1
	RunJ226a1CtM016C03.txt	3	5	control					1131	310	4900	198	4.33	2	11	7	0	509	520	512	720	211	200	208	0	32	21.1	45.2	125.7	14	8.3	25.6	0	15	24	8	0	447	0.15	0.68	0.13	0.04	0	0.45	0.27	0.16	0.02	0.1	1.2
	RunJ226a1CtM016C04.txt	4	5	control					1197	244	6543	235	5.47	1	3	0	0	467	512	704	710	253	208	16	10	37	25.4	109.7	115.7	21.2	10.5	7.5	9.9	12	19	2	1	111.5	0.24	0.59	0.12	0.06	0	0.17	0.23	0.43	0.06	0.11	1.8
	RunJ226a1CtM016C05.txt	5	5	control					772	669	4346	224	5.63	2	2	1	0	396	365	378	404	324	355	342	316	28.9	25.8	71.1	50.1	22.8	26.9	67.9	44.9	14	13	5	7	83	0.18	0.31	0.31	0.15	0.05	0.26	0.13	0.36	0.18	0.08	5.1
	RunJ226a1CtM016C06.txt	6	5	control					1327	113	6015	224	4.53	2	3	0	0	625	627	720	681	95	93	0	39	67.8	41.3	131.9	95.6	13.6	7.1	0	13.3	7	12	0	3	424	0.14	0.77	0.09	0	0	0.08	0.08	0.46	0.17	0.21	0.4
	RunJ226a1CtM016C07.txt	7	5	control					1190	250	5142	199	4.32	1	2	1	3	599	587	549	645	121	133	171	75	35.1	38.5	48.5	44.2	7.8	10.4	15.9	7	16	12	11	10	65.5	0.18	0.69	0.1	0.02	0	0.12	0.26	0.44	0.06	0.12	1
	RunJ226a1CtM016C08.txt	8	5	control					1122	318	5064	203	4.51	2	3	0	0	552	388	632	672	168	332	88	48	35.3	31.2	98.5	76.9	12.5	27.9	29.9	11.2	14	12	3	4	131.5	0.12	0.48	0.27	0.12	0	0.29	0.21	0.32	0.03	0.15	2.4
	RunJ226a1CtM016C09.txt	9	5	control					1066	374	4651	198	4.36	3	2	0	2	563	549	438	582	157	171	282	138	54.1	46.4	99.3	49.3	17.2	17.5	141.8	20	9	10	2	7	83.5	0.18	0.5	0.14	0.14	0.04	0.24	0.21	0.21	0.14	0.21	4.1
	RunJ226a1CtM016C10.txt	10	5	control					1184	257	4548	200	3.84	4	8	0	1	562	439	686	680	158	281	34	40	30.4	23	82.2	68.7	8.8	13.9	10	7	17	19	4	5	217	0.16	0.64	0.18	0.02	0	0.3	0.28	0.26	0.04	0.11	1.1
	RunJ226a1CtM016C11.txt	11	5	control					1379	61	8106	284	5.88	0	1	0	0	645	673	720	720	75	47	0	0	90.5	68.3	131.9	127.5	18.7	8.3	0	0	4	6	0	0	720	0.2	0.7	0.1	0	0	0.08	0.23	0.23	0.08	0.38	1.2
	RunJ226a1CtM016C12.txt	12	5	control					1096	344	4871	215	4.44	10	8	0	1	407	433	658	694	313	287	62	26	21	23.3	77.6	91.7	15.7	15.5	15	6.2	20	18	4	4	125.5	0.11	0.67	0.17	0.04	0	0.47	0.23	0.15	0.04	0.11	1.6
	RunJ226a1CtM016C13.txt	13	5	control					1216	224	5155	191	4.24	4	5	0	0	503	498	715	715	217	222	5	5	31.7	19.6	130.6	112.5	14	9.5	5	5	15	22	1	1	321	0.23	0.69	0.05	0.03	0	0.22	0.45	0.17	0.02	0.12	0.9
	RunJ226a1CtM016C14.txt	14	5	control					951	489	3654	183	3.84	8	17	4	2	382	379	649	492	338	341	71	228	35.2	15.5	72.2	33.1	34	13	15	21.3	10	25	5	11	122.5	0.24	0.47	0.18	0.12	0	0.4	0.29	0.15	0.06	0.1	2.5
	RunJ226a1CtM016C15.txt	15	5	control					1216	224	4073	161	3.35	3	5	1	0	586	502	624	720	134	218	96	0	31.2	24	65.8	112.6	7.9	11	16.6	0	17	19	6	0	394	0.24	0.62	0.1	0.05	0	0.36	0.32	0.18	0.02	0.11	1.1
	RunJ226a1CtM016C16.txt	16	5	control					1225	215	5259	246	4.29	1	7	0	1	566	555	692	636	154	165	28	84	39.4	33	106	69.8	10.3	10.3	12.4	28.2	14	17	2	3	225.5	0.19	0.61	0.17	0.03	0	0.14	0.32	0.3	0.08	0.16	1.2
